# A computational optimization approach for the automatic generation of Gamma Knife radiosurgery treatment plans

Matthew R. Walker<sup>1,2\*</sup>, Mehrdad Malekmohammadi<sup>3\*</sup>, Catherine Coolens<sup>4,5,6</sup>, Normand Laperriere<sup>4,5</sup>, Robert Heaton<sup>4,5</sup>, Ali Sheikholeslami<sup>3</sup>, and Mojgan Hodaie<sup>1,2,7,8</sup>

<sup>1</sup>Department of Surgery, Faculty of Medicine, University of Toronto, Ontario, Canada

<sup>2</sup>Division of Brain, Imaging and Behaviour, Krembil Research Institute, University Health Network, Toronto, Ontario, Canada

<sup>3</sup>Edward S. Rogers Sr. Department of Electrical and Computer Engineering, University of Toronto, Toronto, Ontario, Canada

<sup>4</sup>Department of Radiation Oncology, University of Toronto, Toronto, Ontario, Canada

<sup>5</sup>Radiation Medicine Program, Princess Margaret Cancer Centre, University Health Network, Toronto, Ontario, Canada

<sup>6</sup>Department of Medical Biophysics, University of Toronto, Toronto, Ontario, Canada

<sup>7</sup>Institute of Medical Science, Faculty of Medicine, University of Toronto, Toronto, Ontario, Canada

<sup>8</sup>Division of Neurosurgery, Krembil Neuroscience Centre, Toronto Western Hospital, University Health Network, Toronto, Ontario, Canada

\*Authors contributed equally to this work

**Gamma Knife (GK) radiosurgery is a non-invasive treatment modality which allows single fraction delivery of focused radiation to one or more brain targets. Treatment planning mostly involves manual placement and shaping of shots to conform the prescribed dose to a surgical target. This process can be time consuming and labour intensive. An automated method is needed to determine the optimum combination of treatment parameters to decrease planning time and chance for operator-related error. Recent advancements in hardware platforms which employ parallel computational methods with stochastic optimization schemes are well suited to solving such combinatorial optimization problems efficiently. We present a method of generating optimized GK radiosurgery treatment plans using these techniques, which we name ROCKET (Radiosurgical Optimization Configuration Kit for Enhanced Treatments). Our approach consists of two phases in which shot isocenter positions are generated based on target geometry, followed by optimization of sector collimator parameters. Using this method, complex treatment plans can be generated, on average, in less than one minute, a substantial decrease relative to manual planning. Our results also demonstrate improved selectivity and treatment safety through decreased exposure to nearby organs-at-risk (OARs), compared to manual reference plans with matched coverage. Stochastic optimization is therefore shown to be a robust and efficient clinical tool for the automatic generation of GK radiosurgery treatment plans.**

Gamma Knife (GK) | stereotactic radiosurgery | optimization | automated treatment planning | sector duration optimization (SDO)

Correspondence: [Mojgan.Hodaie@uhn.ca](mailto:Mojgan.Hodaie@uhn.ca)

## Introduction

Gamma Knife® (GK; Elekta, Stockholm, Sweden) radiosurgery is a treatment modality within stereotactic neurosurgery which permits single fraction, focused delivery of radiation to the brain. This technique involves the use of gamma radiation using 192 <sup>60</sup>Co sources which can be precisely focused to irradiate brain targets while sparing nearby healthy tissue. GK is frequently used in the treatment for lesions with high risk of surgical resection, including brain tumors and arteriovenous malformations (1, 2), as well as

trigeminal neuralgia(3, 4) and movement disorders(5–7). The key advantage, in addition to its non-invasive profile, is effective control and conformal delivery of radiation while preserving brain function and with fewer post-operative complications compared to microsurgical resection(8–13).

The current clinical paradigm is a forward planning approach which consists of manually placing and shaping shots throughout the target volume to generate a complex dose distribution. This procedure can be time consuming, taking up to several hours per patient, substantially hindering the clinic schedule and straining healthcare resources. Further, operator variability presents the opportunity for subjective errors to occur. Automated inverse planning software (Wizard™ and Lightning™; Elekta, Stockholm, Sweden) is available but, compared to manual planning, may be insufficiently precise for a satisfactory treatment quality without further manual modification(14). Thus, an efficient and robust planning method is needed to automatically generate treatment plans in a short time which satisfy the clinical requirements of sufficient dose to the target while protecting nearby healthy tissue.

GK treatment planning may be framed as a combinatorial optimization problem as a large array of parameters must be considered in order to craft an effective treatment plan. Recent advances in specialized hardware with parallel computational abilities and stochastic optimization algorithms have made it possible to find global solutions to these problems efficiently(15). Currently available platforms are capable of solving these problems at speeds and scales not possible using traditional computational techniques such as simulated annealing or parallel tempering(15, 16). Similar methods have been successfully implemented for treatment optimization in intensity-modulated radiation therapy, which is notable due to its similarities with GK treatment planning(17, 18).

In this paper we present the clinical application of our GK treatment planning method using a stochastic optimization system which we term ROCKET (Radiosurgical Optimiza-

**NOTE: This preprint reports new research that has not been certified by peer review and should not be used to guide clinical practice.**

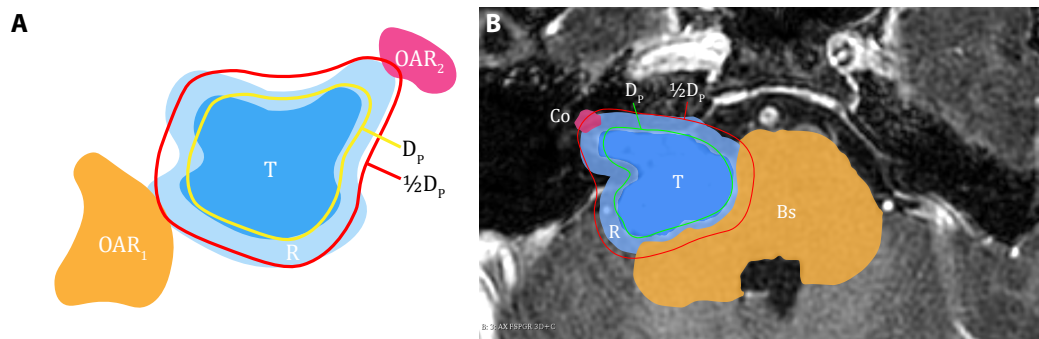

**Fig. 1.** **A)** General diagram of the target T, surrounding rind R, and nearby organs-at-risk OAR<sub>1</sub> and OAR<sub>2</sub>. Dose delivered to R, OAR<sub>1</sub>, and OAR<sub>2</sub> is explicitly minimized in the proposed optimization approach. The prescription isodose and 50% isodose lines are indicated by  $D_p$  and  $\frac{1}{2}D_p$ , respectively. **B)** Specific object segmentation in a patient with acoustic neuroma overlaid on a T1-weighted image. OARs are the cochlea (Co) and brainstem (Bs).

tion Configuration Kit for Enhanced Treatments). We apply this technique to a retrospective cohort of brain tumor patients and perform a comparison with manually generated treatment plans. Our hypothesis is that our proposed planning method will result in significantly reduced plan generation time with no significant reductions in metrics of treatment plan quality. For the purposes of this study, we have selected a common type of lesion treated with GK. Acoustic neuromas are often treated with GK due to their location near the brainstem and the risks associated with surgical resection. The proximity of key organs-at-risk (OARs) necessitates a high level of precision in treatment planning, thus making acoustic neuroma an ideal model for optimization studies.

## Methods

**Research Subjects.** A total of 49 patients (27 female) with acoustic neuroma were randomly sampled through retrospective chart review with approval from the University Health Network Research Ethics Board. Acoustic neuroma is among the most common tumor types treated with GK and is an ideal model for optimization studies due to the proximity of nearby OARs and the wide range of tumor shapes and sizes. Tumor sizes ranged from 0.23 to 11.17cm<sup>3</sup>. All subjects were previously treated with a Leksell Gamma Knife® Perfixion™ (Elekta, Stockholm, Sweden) unit at the Toronto Western Hospital in Toronto, Ontario, Canada using manually generated treatment plans. Given that this is a retrospective study, the time required to generate these archival plans was estimated to require an average of two hours or more, depending on the complexity of the case. All patients underwent 3T magnetic resonance (MR) imaging with contrast enhancement and computed tomography (CT) imaging for targeting guidance and treatment planning. T1-weighted 3D fast spoiled gradient echo (FSPGR) and T2-weighted 3D fast imaging employing steady-state acquisition (FIESTA) images were acquired with 1mm axial slice thickness and in-plane voxel resolution of 0.39mm x 0.39mm. CT images were acquired for each patient after being fitted with a stereotactic frame for targeting accuracy and stability with voxel size = 0.57 mm x 0.57 mm x 1 mm.

Delineation of tumor targets and nearby OARs was performed manually by the treating physicians (neurosurgeon and radiation oncologist) using pre-treatment MR and CT images. These same structure segmentations were used for dose distribution measurements in both optimized and manual ref-

erence plans as well as for isocenter position generation prior to optimization of dose distribution. OARs were present in all subjects as determined by the proximity of critical structures to the tumor. These include, but are not limited to, the brainstem, cochlea, optic chiasm, and trigeminal nerve.

Our ROCKET plan generation procedure is divided into two distinct phases: i) isocenter position determination followed by ii) sector size optimization (SSO). In the isocenter positioning phase, we generate the number of shots and coordinates of each shot in order to coarsely cover the target volume using a novel sphere packing (SP) approach. These isocenter positions remain fixed throughout the subsequent optimization phase. During the SSO phase the sector collimation variables and weights are finely tuned to shape each shot.

To investigate the effects of each phase, we compare three different treatment plans: manual forward planning, Fwd-ROCKET, and SP-ROCKET. Manual forward plans are the retrospectively acquired reference plans which were delivered to patients. Fwd-ROCKET plans use the same manually determined isocenters but with our SSO method applied in the second phase. SP-ROCKET plans are entirely automatically generated with SP in the first phase and SSO in the second phase.

**Treatment Plan Evaluation.** Clinical treatment plans are generally assessed on their ability to deliver the prescribed dose to the target while minimizing the dose deposited to adjacent healthy tissue. Quantitative metrics commonly used in the GK clinic are coverage, selectivity, gradient index, and beam-on time (BOT)(19). Coverage refers to the portion of the target volume which receives at least the prescription dose or greater. Selectivity refers to the volume of the prescription isodose which coincides with the target volume. Ideally, coverage and selectivity would be as close as possible to 100%. Gradient index refers to the rate at which dose spatially drops off outside of the prescription isodose volume (calculated as the ratio of half the prescription isodose volume to the volume of the full prescription isodose). Gradient index is kept as low as possible, indicating a sharp dose drop-off with little dose leakage into surrounding healthy tissue. BOT, the exposure time required to deliver a treatment, is also a consideration as total treatment time must be tolerable for patients. Explicit optimization of BOT may also enhance treatment efficiency and safety.

While the quantitative metrics discussed above provide the

ability to objectively compare different treatment plans, these measures can be difficult to interpret and may not reflect every clinical concern relevant to the case. It is not possible to achieve optimality in each clinical objective in every case as one may negatively impact another; for example, maximizing a target's prescription dose coverage may exceed the safe dose threshold of a nearby OAR. Further, there is some heterogeneity amongst facilities regarding the specific metrics used for plan evaluation as there are advantages and disadvantages to each depending on the type, size, and location of the target(19). For this reason, visual inspection of the spatial dose distribution and dose-volume histogram (DVH) is often performed clinically to complement quantitative metrics. DVH analysis and measured dose to OARs will therefore also be considered in this work.

**Optimization Platform.** In this study we use ROCKET, a stochastic search optimization algorithm which is operated using specialized hardware to solve the combinatorial optimization problem(15, 16). These hardware systems frame the problem in a specific format called Quadratic Unconstrained Binary Optimization (QUBO)(20). QUBO is a powerful formulation for solving combinatorial optimization problems found across a variety of fields including engineering, finance, and government policy(21–24).

An objective function in QUBO format is constructed which simultaneously considers all available parameters to be configured. Penalty terms and coefficients may be added to the function to constrain or prioritize specific output measures of interest. For the purposes of this study, objective functions are constructed for each phase with penalty terms to encourage dose conformity to the target and minimize dose delivered to adjacent healthy tissue. A stochastic Markov Chain Monte Carlo (MCMC) algorithm is run in parallel in order to minimize this function(25). These techniques have been demonstrated to outperform specialized quantum hardware such as D-Wave devices as well as traditional techniques such as simulated annealing and parallel tempering(16, 26).

**Isocenter Positioning.** In the first phase of our proposed method, we employ a novel QUBO-based SP algorithm to generate isocenter position coordinates.

A three-dimensional lattice of candidate shot positions is established over the target volume with a binary variable to place or not place a shot at each coordinate. An objective function is constructed which is minimized by the stochastic algorithm to uniformly distribute shots over the target volume. Shots are forbidden outside the target and penalty terms are incorporated to discourage shot placement close to the target periphery in order to prevent excessive dose to healthy tissue. In this phase, shots are defined as spheres with all collimators set to the same size. Shot spheres with dynamic radius are used to accommodate irregularly shaped targets and those with overlapping radii are penalized to avoid large gradients within the dose distribution (*i.e.* hotspots).

Once the optimal configuration of isocenter positions is identified, these shot coordinates are held fixed as we proceed to the sector optimization phase where the shot shapes will be

finely tuned. It is important to note that this phase allows multiple shots at a single isocenter location. A limitation of the GK hardware is that a single shot weight applies for all sectors in a given shot. While allowing multiple shots at a single isocenter may increase BOT, it also provides more flexibility in adjusting shot shape to achieve a uniform dose distribution across the target.

**Sector Size Optimization.** In the SSO phase of the treatment planning procedure, we optimize the sector collimation parameters and weights for each shot. The 192 gamma emitters in the GK helmet are arranged in eight independent sectors of 24 sources. Each sector is equipped with a set of independently controlled collimators to adjust the aperture size for each source. Changing the aperture size will modulate the flux of gamma energy photons through that sector, ultimately adjusting the shape of the dose distribution for each shot. There are four collimator sizes available for each sector: 4mm, 8mm, 16mm, or blocked (0mm). Shot weight (*i.e.* exposure time) is also considered as this parameter impacts the overall size of each shot. Upon completion of the SSO phase, the final dose is calculated and the treatment parameters are imported into the clinical software.

The specific objective function we have constructed in this phase simultaneously considers all possible collimator configurations and exposure times (weight) for each shot at their fixed isocenter locations. The individual terms of the function are tuned such that minimizing it results in the maximization of the clinical criteria of coverage, selectivity, gradient index, and BOT. Special consideration is paid in this phase to dose delivered to OARs.

**Minimizing Dose to Healthy Tissue.** Among the criteria for evaluating treatment plans is the dose delivered to OARs in the vicinity of the target which often have strict dose restrictions. However, common radiosurgical metrics of coverage, specificity, and gradient index do not directly consider dose to these vulnerable structures. Thus, the sparing of dose to healthy tissue and nearby OARs is included explicitly in the objective function. For the target, a non-overlapping hollow shell called a rind is constructed that conforms to the shape of the target by spatially dilating the target boundary such that the rind volume matches the target volume. By minimizing dose to this shell, the selectivity and gradient index of the dose distribution can be optimized, implicitly minimizing dose delivered to tissue outside the target boundaries. Figure 1 depicts examples of a tumor target, rind, and multiple OARs in the general case and for a specific patient with acoustic neuroma.

Further, dose to nearby OARs is explicitly minimized. Penalty terms are included which consider all OARs together and individually. Including separate terms for each OAR ensures that dose is minimized in those regions regardless of size. For example, the cochlea contributes a relatively small number of voxels to the total volume of OAR in treatments for acoustic neuroma; however, it is highly sensitive to radiation dose resulting in substantial hearing loss or tinnitus(27, 28). Explicit consideration of small OARs pro-

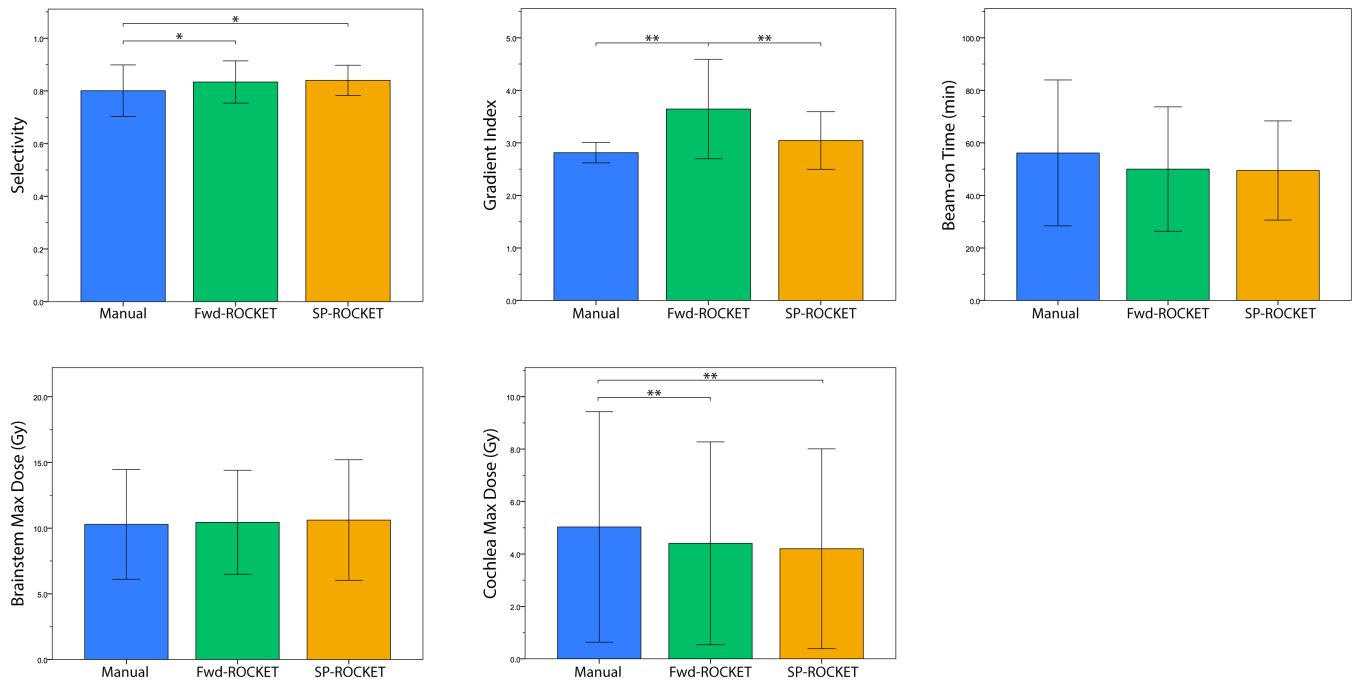

**Fig. 2.** Averaged group data for manual forward planning and optimized Fwd-ROCKET and SP-ROCKET plans. Error bars indicate standard deviation. Significance indicated by \*:  $p < 0.001$ ; \*\*:  $p < 0.0005$ .

notes safe dose levels to these regions and limits negative treatment side effects.

**Statistical Analysis.** A repeated-measures analysis of variance (ANOVA) was carried out to compare treatment metrics across the three planning methods. *P*-values were considered significant at the 0.05 level (false discovery rate, FDR, corrected). A Greenhouse-Geisser correction was used when the data violated the assumption of sphericity. Coverage was scaled to 95% for all plans in this analysis.

## Results

**Overall Results.** Optimized treatment plan generation was completed in an average of  $51.2 \pm 32.3$ s for SP-ROCKET plans and  $27.2 \pm 12.3$ s for Fwd-ROCKET plans. In terms of overall plan quality, optimized GK treatment plans demonstrate equivalent or improved treatment metrics compared to manual forward planning. For this analysis, coverage was set to 95% for all plans.

Target selectivity was increased for all but four subjects (91.8%) in the optimized plans compared to manual forward planning. Average selectivity was significantly improved in SP-ROCKET ( $0.840 \pm 0.058$ ,  $p=0.001$ ) and Fwd-ROCKET ( $0.834 \pm 0.080$ ,  $p=0.001$ ) plans relative to forward planning ( $0.801 \pm 0.098$ ). Mean gradient index did not significantly differ between SP-ROCKET ( $3.046 \pm 0.549$ ,  $p=0.174$ ) and manual plans ( $2.813 \pm 0.194$ ) but was increased in Fwd-ROCKET ( $3.644 \pm 0.945$ ,  $p < 0.0005$ ) plans. In 30 cases (61.2%), BOT was decreased in optimized SP-ROCKET plans compared to manual forward planning. Average BOT, however, was not significantly different between SP-ROCKET ( $49.47 \pm 18.87$ min), Fwd-ROCKET ( $50.00 \pm$

$23.67$ min), and manual forward planning ( $56.14 \pm 27.77$ min;  $p=0.062$ ).

In all but three subjects (93.9%), maximum dose to the cochlea was decreased in the optimized plans compared to forward planning. On average, maximum dose to the cochlea was decreased in both SP-ROCKET ( $4.20 \pm 3.81$ Gy,  $p < 0.0005$ ) and Fwd-ROCKET ( $4.41 \pm 3.87$ Gy,  $p < 0.0005$ ) relative to manual forward planning ( $5.03 \pm 4.40$ Gy). Average values for maximum dose to the brainstem were not significantly different across Fwd-ROCKET ( $10.44 \pm 3.96$ Gy), SP-ROCKET ( $10.61 \pm 4.59$ Gy), and manual forward plans ( $10.28 \pm 4.18$ Gy;  $p=0.275$ ). Average treatment metrics are shown in Table 1 and depicted graphically in Figure 2.

**Detailed Case Illustration.** We present the results of three subjects in detail which are representative of our proposed planning method. These subjects were all treated for acoustic neuroma and span the range of tumor sizes which might be treated by GK: A)  $0.36\text{cm}^3$ , B)  $0.72\text{cm}^3$ , and C)  $5.02\text{cm}^3$ . Optimized treatment plans for these cases were computed in approximately 70-100s. Table 2 presents treatment metrics for the manual forward plan which was delivered to the patient and the optimized SP-ROCKET plan. These results demonstrate an improvement in treatment quality via increased selectivity and decreased dose to OARs, the brain-

**Table 1.** Average metrics for manual forward planning and optimized Fwd-ROCKET and SP-ROCKET plans. Coverage is scaled to 95% for all plans.

|                         | Manual            | Fwd-ROCKET        | SP-ROCKET         |
|-------------------------|-------------------|-------------------|-------------------|
| Selectivity             | $0.801 \pm 0.098$ | $0.834 \pm 0.080$ | $0.840 \pm 0.058$ |
| Gradient Index          | $2.813 \pm 0.194$ | $3.644 \pm 0.945$ | $3.046 \pm 0.549$ |
| BOT (min)               | $56.14 \pm 27.77$ | $50.00 \pm 23.67$ | $49.47 \pm 18.87$ |
| Brainstem Max Dose (Gy) | $10.28 \pm 4.18$  | $10.44 \pm 3.96$  | $10.61 \pm 4.59$  |
| Cochlea Max Dose (Gy)   | $5.03 \pm 4.40$   | $4.41 \pm 3.87$   | $4.20 \pm 3.81$   |
| Planning Time (s)       | -                 | $27.2 \pm 12.3$   | $51.2 \pm 32.3$   |



stem and ipsilateral cochlea.

DVH plots for these patients are shown in Figure 3, depicting both manual and SP-ROCKET treatment plans. The slope of the SP-ROCKET tumor dose curve closely mirrors the manual reference plan. Decreased rind dose and gradient index in the SP-ROCKET plan indicate a sharper dose drop-off outside of the target. The plots also show substantial decreases in dose throughout the volumes of the brainstem and cochlea, demonstrating enhanced treatment safety due to a decreased likelihood of adverse treatment effects related to healthy tissue exposure.

Figure 4 depicts the dose distributions for the acoustic neuroma case illustrations using both manual forward planning and optimized SP-ROCKET planning. The isodose lines demonstrate that there is substantial dose sparing to nearby OARs, particularly the cochlea, while maintaining strong conformity of the prescription dose to the target volume.

## Discussion

In this work we have presented ROCKET, a novel method of automatic GK treatment planning using QUBO-based stochastic optimization. Our results demonstrate that personalized treatment plans can be generated efficiently with quality that is comparable or improved compared to manually generated treatment plans. Specifically, when target coverage is matched between the two approaches, ROCKET treatment plans show improved selectivity and safety through decreased dose to nearby OARs without increasing treatment delivery time. This is accomplished by employing an approach where i) shot isocenter positions are automatically generated and ii) shot shapes are optimized to maximize clinical quality. Automatic GK treatment planning with ROCKET is thus shown to be a robust clinical tool which may enhance the efficiency of clinical radiotherapy treatment planning. While we have demonstrated the use of ROCKET in optimizing GK planning, which tend to be complex and time consuming, this tool is applicable to other types of radiation planning and is non-proprietary to the manufacturers of the GK.

The results presented in this paper are unique as we have demonstrated the ability to generate radiation treatment plans with a substantial time-saving profile while preserving and improving treatment quality. An important feature of our QUBO-based approach is the ability to generate candidate shot isocenters for the optimization. This provides a practical advantage as entire treatment plans may be generated with

**Table 2.** Treatment metrics for sample acoustic neuroma patients with tumor volumes A) 0.36cm<sup>3</sup>, B) 0.72cm<sup>3</sup>, and C) 5.02cm<sup>3</sup>. \*: Time estimated by treating neurosurgeon.

|                          | Case A |           | Case B  |           | Case C  |           |
|--------------------------|--------|-----------|---------|-----------|---------|-----------|
|                          | Manual | SP-ROCKET | Manual  | SP-ROCKET | Manual  | SP-ROCKET |
| Number of Shots          | 6      | 6         | 14      | 14        | 22      | 26        |
| Coverage                 | 0.95   | 0.95      | 0.95    | 0.95      | 0.95    | 0.95      |
| Selectivity              | 0.68   | 0.84      | 0.75    | 0.84      | 0.93    | 0.93      |
| Gradient Index           | 3.04   | 3.38      | 3.01    | 2.71      | 2.60    | 3.02      |
| BOT (min)                | 31.4   | 25.1      | 37.0    | 37.8      | 47.6    | 39.1      |
| Brainstem Max Dose (Gy)  | 4.40   | 5.51      | 6.82    | 6.26      | 12.08   | 12.68     |
| Brainstem Mean Dose (Gy) | 0.89   | 1.07      | 1.00    | 0.83      | 3.56    | 4.16      |
| Cochlea Max Dose (Gy)    | 9.85   | 5.98      | 11.59   | 10.24     | 10.49   | 8.04      |
| Cochlea Mean Dose (Gy)   | 5.53   | 3.92      | 7.78    | 7.22      | 6.80    | 6.07      |
| Planning Time            | 90min* | 72.7sec   | 120min* | 80.2sec   | 180min* | 103.2sec  |

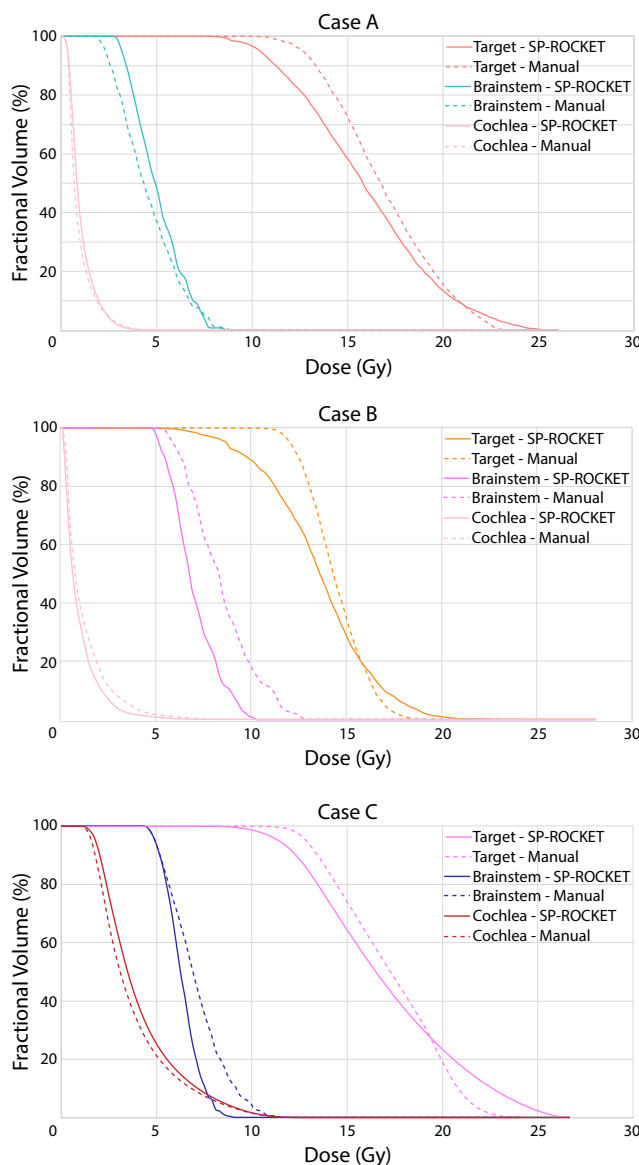

**Fig. 3.** Dose-volume histograms for the acoustic neuroma case illustrations. Manual forward planning is depicted by the dashed line while the optimized SP-ROCKET planning is depicted by the solid line. Dose curves are shown for the tumor, brainstem, and cochlea.

a single computational platform. A recent work has similarly reported simultaneous optimization of sector duration and isocenters in radiotherapy planning based on an integer programming model(29). QUBO-based solvers, as we use this study, have reported computational benefits relative to these techniques, however(15, 16). Existing approaches to radiotherapy optimization have relied upon non-QUBO SP methods for isocenter determination, including adaptations of the grassfire and skeletonization algorithms(30–33). Others have chosen to focus on shot shape optimization while avoiding manipulation of shot positions(34, 35). The Fwd-ROCKET plans presented in this work demonstrate that our SSO on its own has a positive impact on treatment quality with short computation times. ROCKET may thus be incorporated on its own with other geometry-based, non-QUBO isocenter generation approaches to enhance treatment plan-

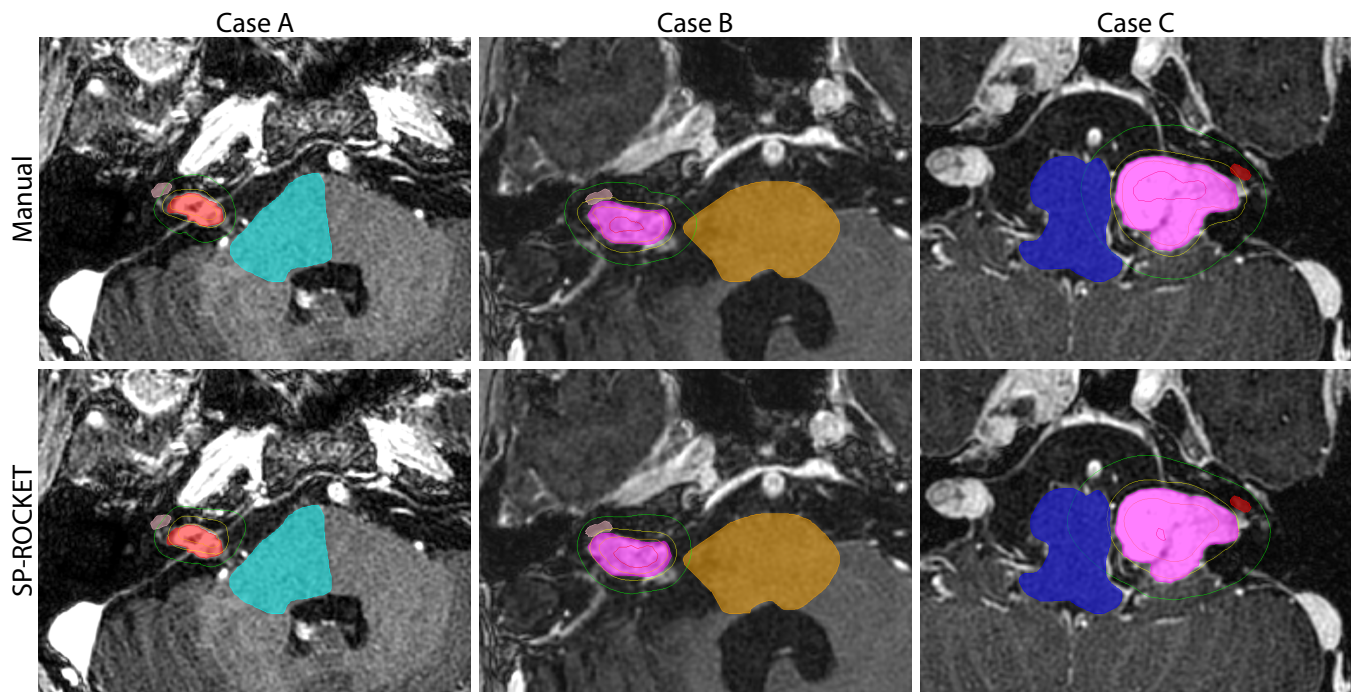

**Fig. 4.** Dose distributions for the acoustic neuroma cases A, B, and C using manual forward planning (top row) and optimized SP-ROCKET planning (bottom row). 5, 10, 15, and 20 Gy isodose lines are shown. Segmentations are shown for the tumor, brainstem, and cochlea. Background is a T1-weighted image in axial view.

ning.

The computational techniques used in this study have previously been demonstrated to be effective in other radiotherapy modalities, namely intensity modulated radiation therapy(18), and this work expands on their utility. ROCKET is thus applicable to radiotherapy planning optimization in general and is not restricted a single modality or hardware platform. Reports have also shown these computational approaches to be powerful in other applications such as medical image segmentation(36), finance(37), telecommunications(38, 39), and computer science(40). Other techniques for automatic treatment planning have been reported based on simulated annealing, linear programming, mixed-integer programming, or piecewise penalty methods(29, 34, 35, 41, 42). These models may achieve clinically acceptable plans in terms of quantitative metrics but may have shortcomings in terms of computation time, hardware limitations, or long delivery times. QUBO solvers like ROCKET have previously demonstrated advantages relative to these techniques for solving combinatorial optimization problems such as radiotherapy treatment plan generation(15, 16).

**Limitations.** A limitation of this study that may be identified is a disparity in the dose kernels used for calculation of the dose distribution between the manual treatment plans and the DA. The dosimetry software used in the clinical Leksell GammaPlan™ software (TMR10) is proprietary on behalf of the manufacturer and not shared publicly. We did not have direct access to this dose kernel and thus had to reconstruct it locally by generating phantom plans in the clinic with single sectors of each collimator size and summing the contributions of each sector individually for more complex shot arrange-

ments. We believe that our estimation of the dose kernel is robust but recognize the potential for disparity.

Another potential limitation is the choice of metrics used for evaluation of radiosurgery plans. The primary metrics incorporated in our optimization scheme were coverage, selectivity, and gradient index as those are the primary metrics used in the clinic. Other quantitative metrics have been formulated for plan evaluation which may be more appropriate, depending on the diagnosis, size, and location of the tumor(19, 43–45). We note that this limitation applies to both the manual reference plans and those generated by ROCKET.

## Conclusions

We have developed a procedure for generating GK radiosurgery treatment plans automatically using a QUBO-based optimization platform called ROCKET. Personalized treatment plans were generated rapidly and demonstrate equivalent or improved treatment quality compared to manual forward planning. This tool has great potential for the automatic preparation and enhancement of clinical workflow in radiosurgery treatments.

## ACKNOWLEDGEMENTS

The authors would like to thank Fujitsu Limited and Fujitsu Consulting (Canada) Inc. for providing financial support.

## Bibliography

1. Bruce E. Pollock. Gamma knife radiosurgery of arteriovenous malformations: Long-term outcomes and late effects. *Progress in Neurological Surgery*, 34:238–247, 2019. ISSN 16623924. doi: 10.1159/000493070.
2. Deyuan Zhu, Zhe Li, Yongxin Zhang, Yibin Fang, Qiang Li, Rui Zhao, Bo Hong, Yi Xu, Jianmin Liu, and Qinghai Huang. Gamma knife surgery with and without embolization for cerebral arteriovenous malformations: A systematic review and meta-analysis. *Journal of Clinical Neuroscience*, 56:67–73, 10 2018. ISSN 15322653. doi: 10.1016/j.jocn.2018.07.008.

3. Sarasa Tohyama, Peter S.-P. Hung, Jidan Zhong, and Mojgan Hodaie. Early postsurgical diffusivity metrics for prognostication of long-term pain relief after gamma knife radiosurgery for trigeminal neuralgia. *Journal of Neurosurgery*, 131:539–548, 8 2018. ISSN 0022-3085. doi: 10.3171/2018.3.JNS172936.
4. Peter Shih-Ping Ping Hung, Sarasa Tohyama, Jia Y. Zhang, and Mojgan Hodaie. Temporal disconnection between pain relief and trigeminal nerve microstructural changes after gamma knife radiosurgery for trigeminal neuralgia. *Journal of Neurosurgery*, 133:1–9, 7 2019. ISSN 0022-3085. doi: 10.3171/2019.4.JNS19380.
5. Ameer L. Elaimy, Benjamin J. Arthurs, Wayne T. Lamoreaux, John J. Demakas, Alexander R. Mackay, Robert K. Fairbanks, David R. Greeley, Barton S. Cooke, and Christopher M. Lee. Gamma knife radiosurgery for movement disorders: A concise review of the literature, 7 2010. ISSN 14777819.
6. Ali Kooshkabadi, L Dade Lunsford, Daniel Tonetti, John C Flickinger, and Douglas Kondziolka. Gamma knife thalamotomy for tremor in the magnetic resonance imaging era. *Journal of neurosurgery*, 118:713–718, 4 2013. ISSN 1933-0693. doi: 10.3171/2013.1.JNS121111.
7. Douglas Kondziolka, Joseph G. Ong, John YK. Lee, Robert Y. Moore, John C. Flickinger, and L. Dade Lunsford. Gamma knife thalamotomy for essential tremor. *Journal of Neurosurgery*, 108:111–117, 1 2008. ISSN 00223085. doi: 10.3171/JNS/2008/108/01/0111.
8. Bruce E. Pollock, Colin L.W. Driscoll, Robert L. Foote, Michael J. Link, Deborah A. Gorman, Christopher D. Bauch, Jayawant N. Mandrekar, Karl N. Krecke, and Craig H. Johnson. Patient outcomes after vestibular schwannoma management: a prospective comparison of microsurgical resection and stereotactic radiosurgery. *Neurosurgery*, 59:77–85, 7 2006. ISSN 0148-396X. doi: 10.1227/01.NEU.0000219217.14930.14.
9. Benjamin J. Arthurs, Robert K. Fairbanks, John J. Demakas, Wayne T. Lamoreaux, Neil A. Giddings, Alexander R. Mackay, Barton S. Cooke, Ameer L. Elaimy, and Christopher M. Lee. A review of treatment modalities for vestibular schwannoma. *Neurosurgical Review*, 34:265–279, 7 2011. ISSN 0344-5607. doi: 10.1007/s10143-011-0307-8.
10. J G Rowe, M W R Radatz, L Walton, A Hampshire, S Seaman, and A A Kemeny. Gamma knife stereotactic radiosurgery for unilateral acoustic neuromas. *Journal of Neurology, Neurosurgery and Psychiatry*, 74:1536–1542, 11 2003. ISSN 0022-3050. doi: 10.1136/jnnp.74.11.1536.
11. Yoshinori Higuchi, Masaaki Yamamoto, Toru Serizawa, Hitoshi Aiyama, Yasunori Sato, and Bierta E. Barford. Modern management for brain metastasis patients using stereotactic radiosurgery: literature review and the authors' gamma knife treatment experiences. *Cancer Management and Research*, Volume 10:1889–1899, 7 2018. ISSN 1179-1322. doi: 10.2147/CMAR.S116718.
12. Hanno M. Specht and Stephanie E. Combs. Stereotactic radiosurgery of brain metastases, 9 2016. ISSN 18271855.
13. Yi Chieh Hung, Cheng Chia Lee, Wan Yuo Guo, Cheng Ying Shiau, Yue Cune Chang, David Hung Chi Pan, Jason P. Sheehan, and Wen Yuh Chung. Gamma knife radiosurgery for the treatment of cavernous sinus meningiomas: post-treatment long-term clinical outcomes, complications, and volume changes. *Journal of Neuro-Oncology*, 143:261–270, 6 2019. ISSN 15737373. doi: 10.1007/s11060-019-03090-6.
14. D Kondziolka, O Zorro, J Lobato-Polo, H Kano, T J Flannery, J C Flickinger, and L D Lunsford. Gamma knife stereotactic radiosurgery for idiopathic trigeminal neuralgia. *J.Neurosurg.*, 9 2009. DA - 20090914.
15. Satoshi Matsubara, Motomu Takatsu, Toshiyuki Miyazawa, Takayuki Shibasaki, Yasuhiro Watanabe, Kazuya Takemoto, and Hirotaka Tamura. Digital talkeyer for high-speed solving of combinatorial optimization problems and its applications. *Proceedings of the Asia and South Pacific Design Automation Conference, ASP-DAC*, 2020-January:667–672, 1 2020. doi: 10.1109/ASP-DAC47756.2020.9045100.
16. Malihah Aramon, Gili Rosenberg, Elisabetta Valiante, Toshiyuki Miyazawa, Hirotaka Tamura, and Helmut G. Katzgraber. Physics-inspired optimization for quadratic unconstrained problems using a digital annealer. *Frontiers in Physics*, 7:48, 4 2019. ISSN 2296-424X. doi: 10.3389/fphy.2019.00048.
17. Daryl P. Nazareth and Jason D Spaans. First application of quantum annealing to imrt beamlet intensity optimization. *Physics in Medicine and Biology*, 60:4137–4148, 5 2015. ISSN 0031-9155. doi: 10.1088/0031-9155/60/10/4137.
18. Mehrdad Malekmohammadi, Keivan Dabiri, Joshua Mathews, Daryl P. Nazareth, Hirotaka Tamura, and Ali Sheikholeslami. A hamiltonian engine for radiotherapy optimization. volume 2020-July, pages 5085–5088. Institute of Electrical and Electronics Engineers Inc., 7 2020. ISBN 9781728119908. doi: 10.1109/EMBC44109.2020.9175415.
19. Loïc Feuvret, Georges Noël, Jean Jacques Mazon, and Pierre Bey. Conformity index: A review. *International Journal of Radiation Oncology Biology Physics*, 64:333–342, 2 2006. ISSN 03603016. doi: 10.1016/j.ijrobp.2005.09.028.
20. Andrew Lucas. Ising formulations of many np problems. *Frontiers in Physics*, 2:5, 2 2014. ISSN 2296-424X. doi: 10.3389/fphy.2014.00005.
21. Martin Anthony, Endre Boros, Yves Crama, and Aritanan Gruber. Quadratic reformulations of nonlinear binary optimization problems. *Mathematical Programming*, 162:115–144, 3 2017. ISSN 14364646. doi: 10.1007/s10107-016-1032-4.
22. Fred Glover, Gary Kochenberger, and Yu Du. A tutorial on formulating and using qubo models. 11 2018.
23. Gary Kochenberger, Jin Kao Hao, Fred Glover, Mark Lewis, Zhipeng Lü, Haibo Wang, and Yang Wang. The unconstrained binary quadratic programming problem: A survey. *Journal of Combinatorial Optimization*, 28:58–81, 4 2014. ISSN 15732886. doi: 10.1007/s10878-014-9734-0.
24. Gary A. Kochenberger and Fred Glover. A unified framework for modeling and solving combinatorial optimization problems: A tutorial, 6 2006.
25. W. K. Hastings. Monte carlo sampling methods using markov chains and their applications. *Biometrika*, 57:97, 4 1970. ISSN 00063444. doi: 10.2307/2334940.
26. Salvatore Mandrà, Zheng Zhu, Wenlong Wang, Alejandro Perdomo-Ortiz, and Helmut G. Katzgraber. Strengths and weaknesses of weak-strong cluster problems: A detailed overview of state-of-the-art classical heuristics versus quantum approaches. *Physical Review A*, 94:022337, 8 2016. ISSN 24699934. doi: 10.1103/PhysRevA.94.022337.
27. Tsair Fwu Lee, Shyh An Yeh, Pei Ju Chao, Liyun Chang, Chien Liang Chiu, Hui Min Ting, Hung Yu Wang, and Yu Jie Huang. Normal tissue complication probability modeling for cochlea constraints to avoid causing tinnitus after head-and-neck intensity-modulated radiation therapy. *Radiation Oncology*, 10, 9 2015. ISSN 1748717X. doi: 10.1186/s13014-015-0501-x.
28. Silvia Scoccianti, Beatrice Detti, Davide Gadda, Daniela Greto, Ilaria Furfaro, Fiammetta Meacci, Gabriele Simontacchi, Lucia Di Brina, Pierluigi Bonomo, Irene Giacomelli, Icro Meattini, Monica Mangoni, Sabrina Cappelli, Sara Cassani, Cinzia Talamonti, Lorenzo Bordi, and Lorenzo Livi. Organs at risk in the brain and their dose-constraints in adults and in children: A radiation oncologist's guide for delineation in everyday practice. *Radiotherapy and Oncology*, 114:230–238, 2 2015. ISSN 18790887. doi: 10.1016/j.radonc.2015.01.016.
29. Mucahit Cevik, Dionne Aleman, Young Lee, Azamat Berdyshev, H Nordström, Stella Riad, Arjun Sahgal, Mark Ruschin, Hakan Nordstrom, Stella Riad, Arjun Sahgal, and Mark Ruschin. Simultaneous optimization of isocenter locations and sector duration in radiosurgery. *Physics in medicine and biology*, 64:025010, 7 2018. ISSN 1361-6560. doi: 10.1088/1361-6560/aaf7ce.
30. Kimia Ghobadi, Hamid R. Ghaffari, Dionne M. Aleman, David A. Jaffray, and Mark Ruschin. Automated treatment planning for a dedicated multi-source intracranial radiosurgery treatment unit using projected gradient and grassfire algorithms. *Medical Physics*, 39:3134–3141, 5 2012. ISSN 00942405. doi: 10.1118/1.4709603.
31. Thomas H. Wagner, Taeli Yi, Sanford L. Meeks, Francis J. Bova, Beverly L. Brechner, Yunmei Chen, John M. Buatti, William A. Friedman, Kelly D. Foote, and Lionel G. Bouchet. A geometrically based method for automated radiosurgery planning. *International Journal of Radiation Oncology Biology Physics*, 48:1599–1611, 12 2000. ISSN 0360-3016. doi: 10.1016/S0360-3016(00)00790-2.
32. Evgueniia Doudareva, Kimia Ghobadi, Dionne M. Aleman, Mark Ruschin, and David A. Jaffray. Skeletonization for isocentre selection in gamma knife@perfexion™. *TOP*, 23: 369–385, 7 2015. ISSN 18638279. doi: 10.1007/s11750-014-0344-x.
33. Jie Wang. Medial axis and optimal locations for min-max sphere packing. *Journal of Combinatorial Optimization*, 4:487–503, 2000. ISSN 13826905. doi: 10.1023/A:1009889628489.
34. J. Sjölund, S. Riad, M. Hennix, and H. Nordström. A linear programming approach to inverse planning in gamma knife radiosurgery. *Medical physics*, 46:1533–1544, 4 2019. ISSN 2473-4209. doi: 10.1002/mp.13440.
35. M Cevik, P Shirvani Ghomi, D Aleman, Y Lee, A Berdyshev, H Nordstrom, S Riad, A Sahgal, M Ruschin, M Cevik, P Shirvani Ghomi, D Aleman, Y Lee, A Berdyshev, H Nordstrom, S Riad, A Sahgal, and M Ruschin. Modeling and comparison of alternative approaches for sector duration optimization in a dedicated radiosurgery system. *Physics in medicine and biology*, 63:155009, 2018. ISSN 1361-6560. doi: 10.1088/1361-6560/AAD105.
36. Jiankun Wang and Shahrokh Valaee. Enhancing medical imaging semantic segmentation using the digital annealer. pages 217–225. Institute of Electrical and Electronics Engineers Inc., 6 2019. ISBN 9781728107080. doi: 10.1109/DSW.2019.8755548.
37. Seo Hong, Pierre Miasnikof, Roy Kwon, and Yuri Lawrystyn. Market graph clustering via qubo and digital annealing. 6 2020.
38. Muhammed Tahsin Rahman, Shuo Han, Navid Tadayon, and Shahrokh Valaee. Ising model formulation of outlier rejection, with application in wifi based positioning. volume 2019-May, pages 4405–4409. Institute of Electrical and Electronics Engineers Inc., 5 2019. ISBN 9781479981311. doi: 10.1109/ICASSP.2019.8683807.
39. Mohammad Javad-Kalbasi, Keivan Dabiri, Shahrokh Valaee, and Ali Sheikholeslami. Digitally annealed solution for the vertex cover problem with application in cyber security. volume 2019-May, pages 2642–2646. Institute of Electrical and Electronics Engineers Inc., 5 2019. ISBN 9781479981311. doi: 10.1109/ICASSP.2019.8683696.
40. Eldan Cohen, Avradip Mandal, Hayato Ushijima-Mwesigwa, and Arnab Roy. Ising-based consensus clustering on specialized hardware. volume 12080 LNCS, pages 106–118. Springer, 4 2020. ISBN 9783030445836. doi: 10.1007/978-3-030-44584-3\_9.
41. Eva K. Lee, Tim Fox, and Ian Crocker. Integer programming applied to intensity-modulated radiation therapy treatment planning. volume 119, pages 165–181. Kluwer Academic Publishers, 2003. doi: 10.1023/A:1022938707934.
42. H. Edwin Romeijn, Ravindra K. Ahuja, James F. Dempsey, Arvind Kumar, and Jonathan G. Li. A novel linear programming approach to fluence map optimization for intensity modulated radiation therapy treatment planning. *Physics in Medicine and Biology*, 48:3521–3542, 11 2003. ISSN 00319155. doi: 10.1088/0031-9155/48/21/005.
43. Edward Shaw, Robert Kline, Michael Gillin, Luis Souhami, Alan Hirschfeld, Robert Dinapoli, and Linda Martin. Radiation therapy oncology group: Radiosurgery quality assurance guidelines. *International Journal of Radiation Oncology, Biology, Physics*, 27:1231–1239, 12 1993. ISSN 03603016. doi: 10.1016/0360-3016(93)90548-A.
44. Sharika Venugopal Menon, Raghukumar Paramu, Sajju Bhasi, and Raghuram Kesavan Nair. Evaluation of plan quality metrics in stereotactic radiosurgery/radiotherapy in the treatment plans of arteriovenous malformations. *Journal of Medical Physics*, 43:214–220, 10 2018. ISSN 19983913. doi: 10.4103/jmp.JMP\_25\_18.
45. Michael Torrens, Caroline Chung, Hyun Tai Chung, Patrick Hanssens, David Jaffray, Andras Kemeny, David Larson, Marc Levivier, Christer Lindquist, Bodo Lippitz, Josef Novotny, Ian Paddick, Dheerendra Prasad, and Chung Ping Yu. Standardization of terminology in stereotactic radiosurgery: Report from the standardization committee of the international leksell gamma knife society: special topic. volume 121, pages 2–15. American Association of Neurological Surgeons, 12 2014. doi: 10.3171/2014.7.gks141199.
